# Supplementary material for: Role of Cholesterol 25-Hydroxylase (Ch25h) in Mediating Innate Immune Responses to Streptococcus pneumoniae Infection
Source: MDPI journal article supplement (doi:10.3390/cells12040570), 2023-02-10
Supplement: s1 [file s1]

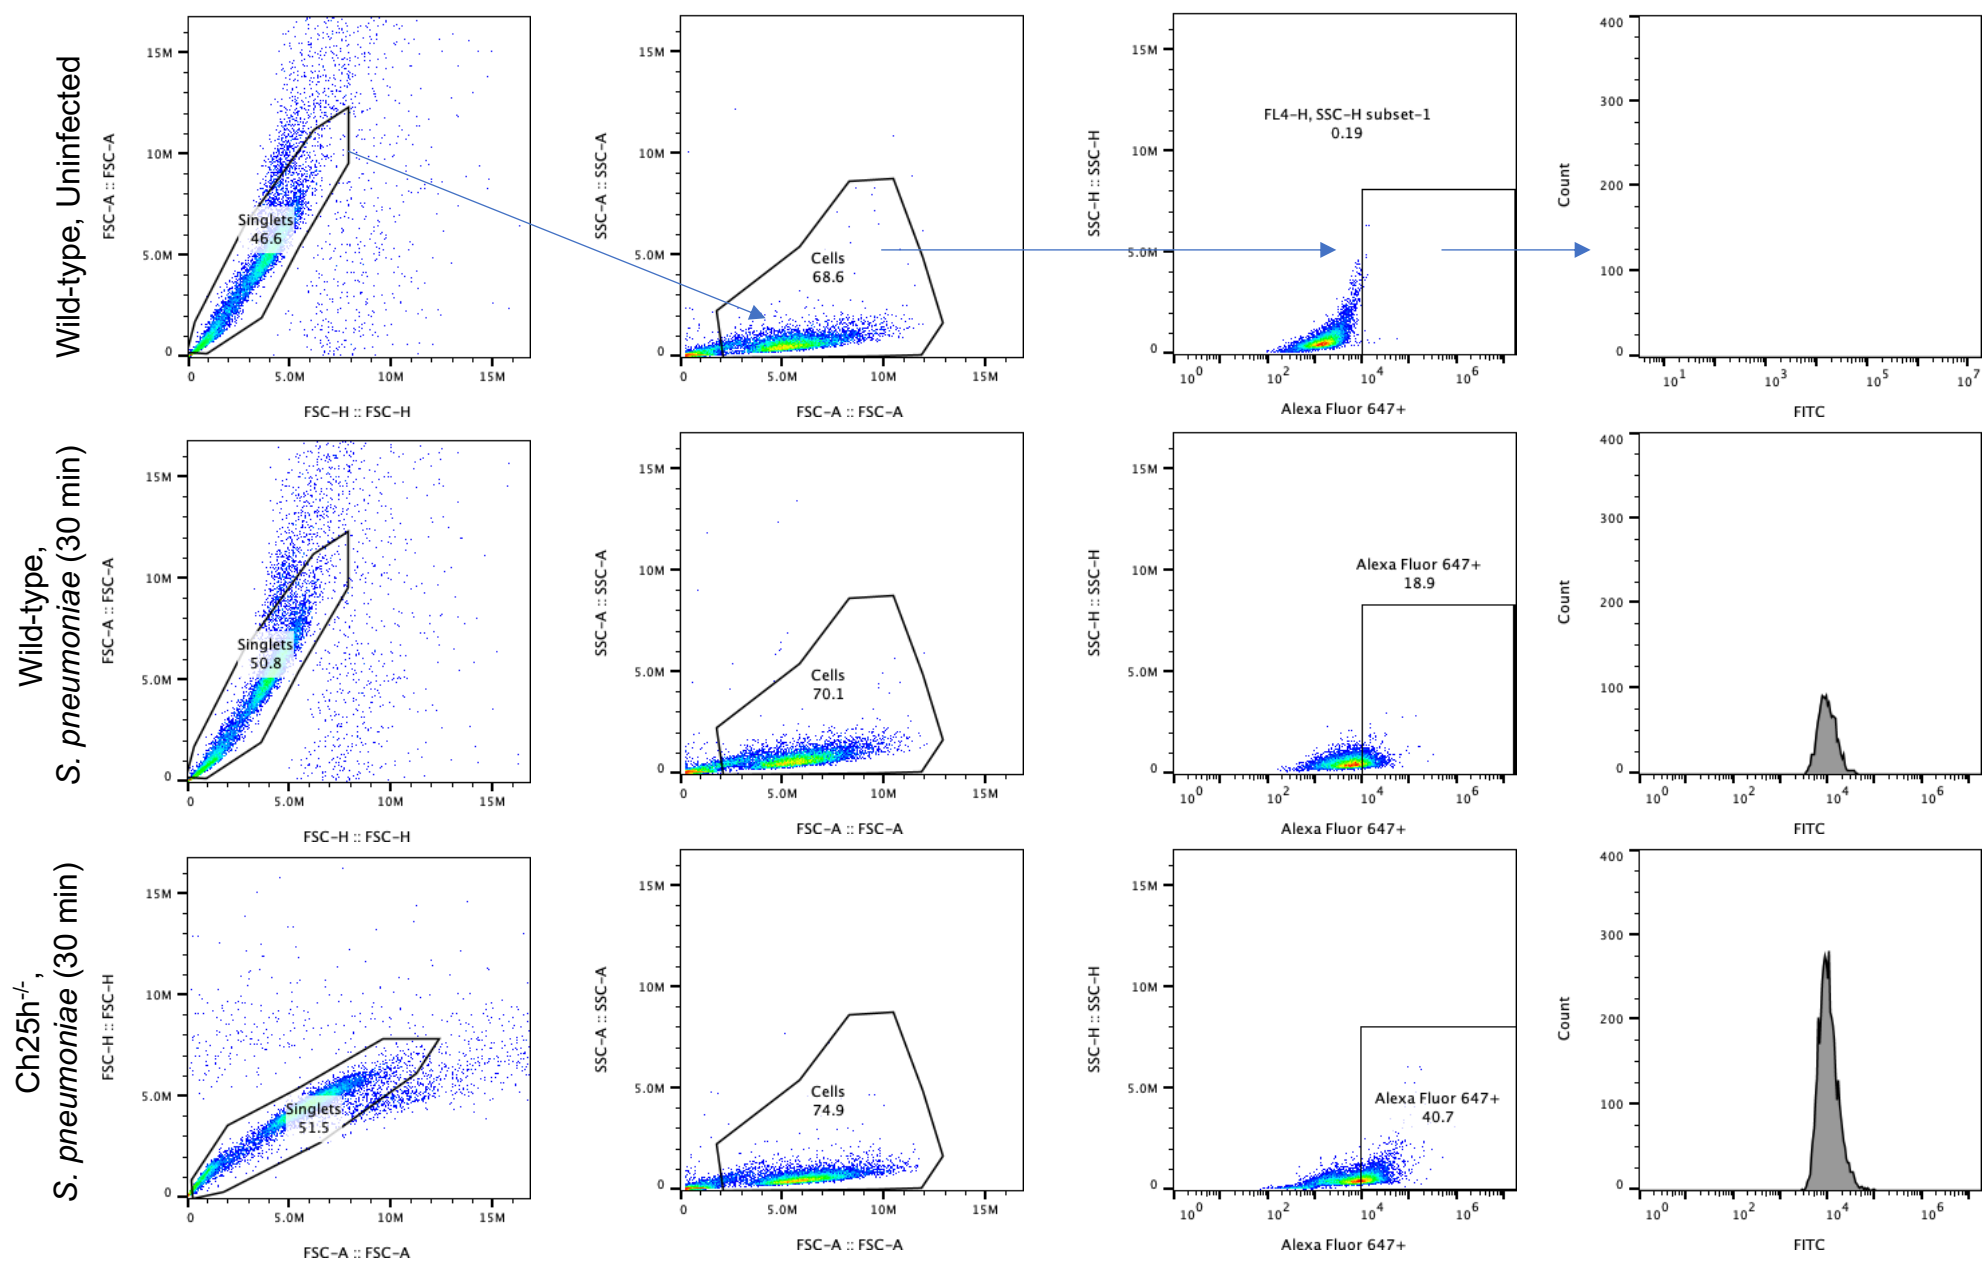

**Supplemental Figure S1:** Gating strategy for alveolar macrophage phagocytosis of Alexa Fluor 647+ FITC labeled *S. pneumoniae*. Representative control and 30-minute samples are shown.

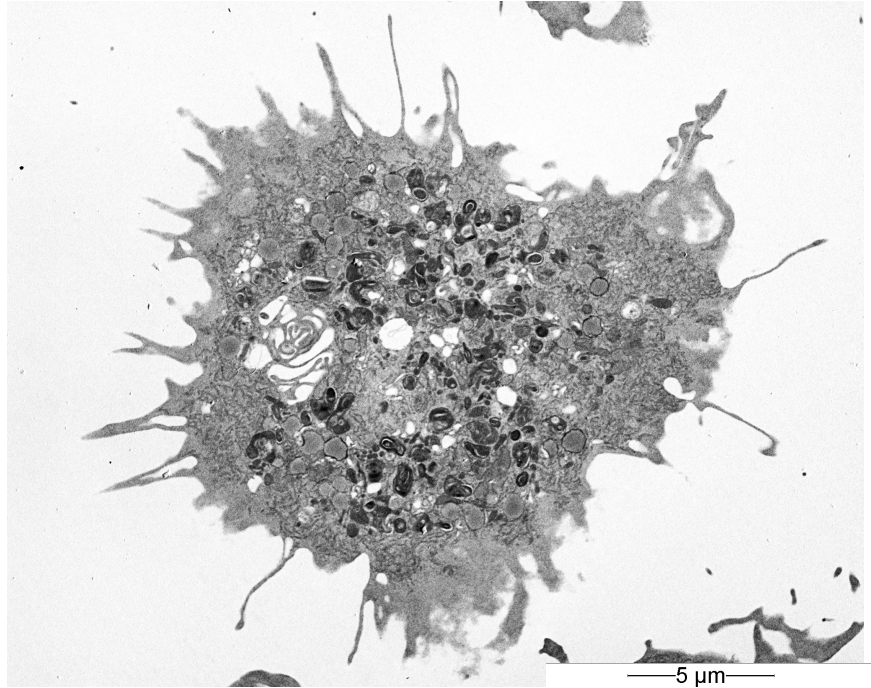

Wild-type, Media Treated

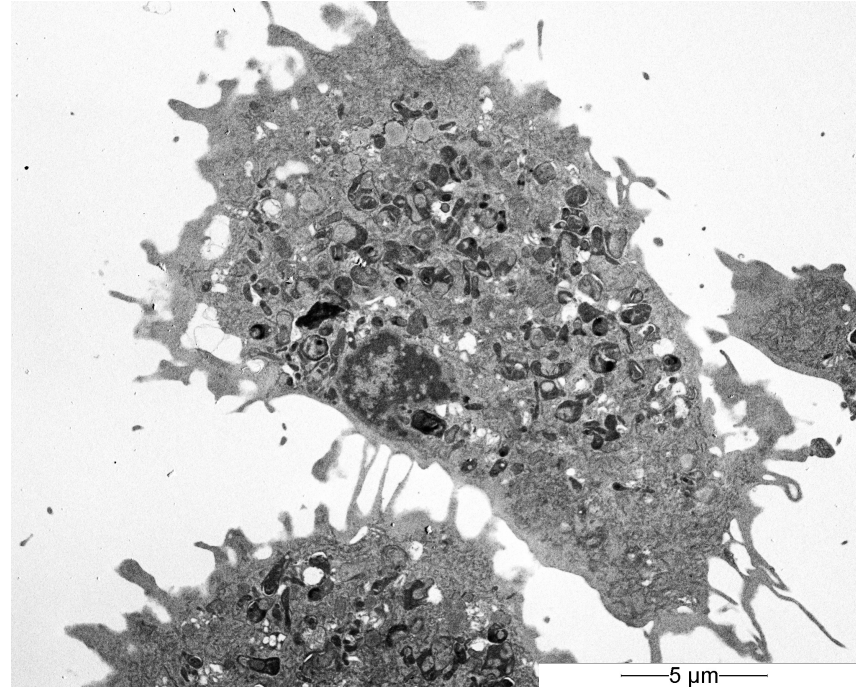

*Ch25h*<sup>-/-</sup>, Media Treated
